# Supplementary material for: Spatio-Temporal Variation in the Exceedance of Enterococci in Lake Burley Griffin: An Analysis of 16 Years’ Recreational Water Quality Monitoring Data
Source: MDPI journal article supplement (doi:10.3390/ijerph21050579), 2024-05-01
Supplement: s1 [file s1]

# Spatio-Temporal Variation in the Exceedance of Enterococci in Lake Burley Griffin: An Analysis of 16 Years' Recreational Water Quality Monitoring Data

Ripon Kumar Adhikary <sup>1,2,\*</sup>, Danswell Starrs <sup>3,4</sup>, David Wright <sup>5</sup>, Barry Croke <sup>6</sup>, Kathryn Glass <sup>1</sup> and Aparna Lal <sup>1</sup>

<sup>1</sup> National Centre for Epidemiology and Population Health, Australian National University, Canberra 2601, Australia; kathryn.glass@anu.edu.au (K.G.); aparna.lal@anu.edu.au (A.L.)

<sup>2</sup> Department of Fisheries and Marine Bioscience, Jashore University of Science and Technology, Jashore 7408, Bangladesh

<sup>3</sup> Environment, Planning and Sustainable Development Directorate, ACT Government, Canberra 2601, Australia; danswell.starrs@act.gov.au

<sup>4</sup> Research School of Biology, Australian National University, Canberra 2601, Australia

<sup>5</sup> Lake and Dam, National Capital Authority, Canberra 2601, Australia; david.wright@nca.gov.au

<sup>6</sup> Institute for Water Futures, Mathematical Sciences Institute and Fenner School of Environment and Society, Australian National University, Canberra 2601, Australia; barry.croke@anu.edu.au

\* Correspondence: ripon.adhikary@anu.edu.au

## Supplementary Materials:

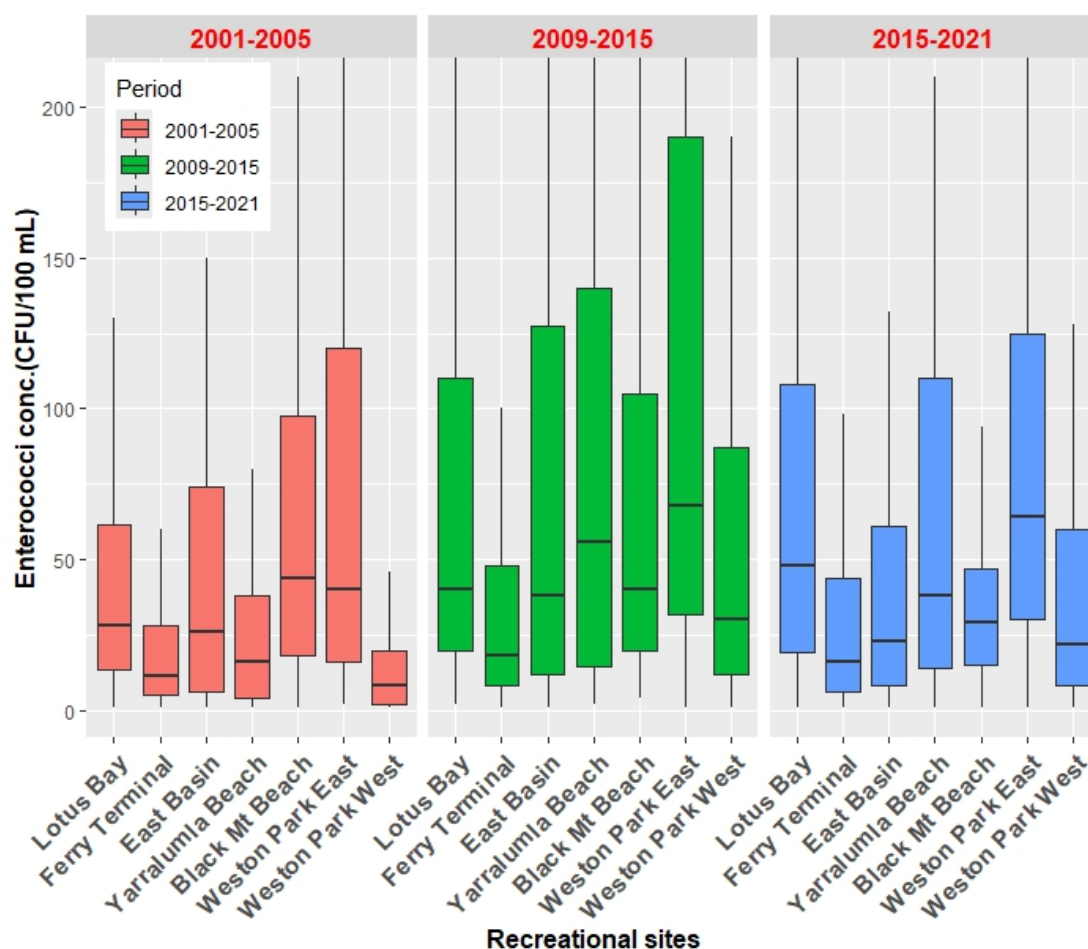

**Figure S1.** Percentile distribution of enterococci concentration in seven recreational sites over three periods (2001-2005, 2009-2015, 2015-2021)

**Table S1.** Descriptive statistics of study variables showing percentiles and p-values.

| Variables               | 25th percen-<br>tile | 50th percentile<br>(Median) | 75th percentile | * <i>p</i> -value |
|-------------------------|----------------------|-----------------------------|-----------------|-------------------|
| Sites                   |                      |                             |                 |                   |
| Lotus Bay               | 18                   | 40                          | 100             | < 0.001           |
| Ferry Terminal          | 6                    | 14                          | 40.5            |                   |
| East Basin              | 10                   | 26                          | 82              |                   |
| Yarralumla Beach        | 10                   | 33                          | 111.5           |                   |
| Black Mountain Beach    | 17                   | 34                          | 80.5            |                   |
| Weston Park East        | 24.5                 | 60                          | 157.5           |                   |
| Weston Park West        | 6                    | 20                          | 60              |                   |
| Months                  |                      |                             |                 |                   |
| October                 | 6                    | 16                          | 43.75           | < 0.001           |
| November                | 13.25                | 40                          | 121.5           |                   |
| December                | 16                   | 40                          | 100             |                   |
| January                 | 14                   | 36                          | 96              |                   |
| February                | 16                   | 40                          | 101.5           |                   |
| March                   | 10                   | 26                          | 64              |                   |
| April                   | 10                   | 22                          | 54.5            |                   |
| Years                   |                      |                             |                 |                   |
| 2001-2002               | 9                    | 28                          | 97              | < 0.001           |
| 2002-2003               | 6                    | 22                          | 52              |                   |
| 2003-2004               | 6                    | 16                          | 49.5            |                   |
| 2004-2005               | 6                    | 14                          | 39.5            |                   |
| 2009-2010               | 16                   | 32                          | 76              |                   |
| 2010-2011               | 20                   | 60                          | 210             |                   |
| 2011-2012               | 16                   | 46                          | 142.5           |                   |
| 2012-2013               | 12                   | 30                          | 85              |                   |
| 2013-2014               | 12                   | 36                          | 120             |                   |
| 2014-2015               | 12                   | 34                          | 98              |                   |
| 2015-2016               | 12                   | 30                          | 78              |                   |
| 2016-2017               | 19                   | 46                          | 82              |                   |
| 2017-2018               | 22                   | 48                          | 102             |                   |
| 2018-2019               | 6                    | 17                          | 46.5            |                   |
| 2019-2020               | 6                    | 18.5                        | 83.5            |                   |
| 2020-2021               | 20                   | 37                          | 93.5            |                   |
| Primary use of site     |                      |                             |                 |                   |
| Swimming activities     | 17                   | 40                          | 110             | < 0.001           |
| Non swimming activities | 8                    | 24                          | 70              |                   |

\*Kruskal-Wallis H test.

**Table S2.** Distribution of faecal indicator bacteria (measured by enterococci concentration) exceedance by frequency (n) and percentage (%) across sites, months, years, periods, and primary use of Lake Burley Griffin sites.

| Variables            | Non-exceedance |       | Exceedance |       | Total | <i>p</i> -value |
|----------------------|----------------|-------|------------|-------|-------|-----------------|
|                      | n              | %     | n          | %     | N     |                 |
| Sites                |                |       |            |       |       |                 |
| Lotus Bay            | 367            | 87.59 | 52         | 12.41 | 419   |                 |
| Ferry Terminal       | 396            | 94.74 | 22         | 5.26  | 418   |                 |
| East Basin           | 366            | 87.14 | 54         | 12.86 | 420   |                 |
| Yarralumla Beach     | 361            | 86.78 | 55         | 13.22 | 416   |                 |
| Black Mountain Beach | 377            | 90.41 | 40         | 9.59  | 417   |                 |
| Weston Park East     | 339            | 81.49 | 77         | 18.51 | 416   |                 |
| Weston Park West     | 392            | 93.78 | 26         | 6.22  | 418   |                 |
| Months               |                |       |            |       |       |                 |
| October              | 361            | 92.09 | 31         | 7.91  | 392   | <0.001          |
| November             | 373            | 83.26 | 75         | 16.74 | 448   |                 |
| December             | 415            | 88.30 | 55         | 11.70 | 470   |                 |
| January              | 422            | 88.47 | 55         | 11.53 | 477   |                 |
| February             | 363            | 86.43 | 57         | 13.57 | 420   |                 |
| March                | 419            | 92.09 | 36         | 7.91  | 455   |                 |
| April                | 245            | 93.51 | 17         | 6.49  | 262   |                 |
| Years                |                |       |            |       |       |                 |
| 2001-2002            | 159            | 84.57 | 29         | 15.43 | 188   | <0.001          |
| 2002-2003            | 185            | 94.39 | 11         | 5.61  | 196   |                 |
| 2003-2004            | 180            | 95.24 | 9          | 4.76  | 189   |                 |
| 2004-2005            | 102            | 91.07 | 10         | 8.93  | 112   |                 |
| 2009-2010            | 111            | 93.28 | 8          | 6.72  | 119   |                 |
| 2010-2011            | 151            | 74.38 | 52         | 25.62 | 203   |                 |
| 2011-2012            | 174            | 82.86 | 36         | 17.14 | 210   |                 |
| 2012-2013            | 168            | 88.89 | 21         | 11.11 | 189   |                 |
| 2013-2014            | 161            | 87.50 | 23         | 12.50 | 184   |                 |
| 2014-2015            | 165            | 89.19 | 20         | 10.81 | 185   |                 |
| 2015-2016            | 183            | 93.37 | 13         | 6.63  | 196   |                 |
| 2016-2017            | 169            | 89.42 | 20         | 10.58 | 189   |                 |
| 2017-2018            | 175            | 89.29 | 21         | 10.71 | 196   |                 |
| 2018-2019            | 178            | 94.18 | 11         | 5.82  | 189   |                 |
| 2019-2020            | 168            | 88.42 | 22         | 11.58 | 190   |                 |
| 2020-2021            | 169            | 89.42 | 20         | 10.58 | 189   |                 |
| Periods              |                |       |            |       |       |                 |
| 2001-2005            | 626            | 91.39 | 59         | 8.61  | 685   | <0.001          |
| 2009-2015            | 930            | 85.32 | 160        | 14.68 | 1090  |                 |
| 2015-2021            | 1042           | 90.69 | 107        | 9.31  | 1149  |                 |
| Primary use of site  |                |       |            |       |       |                 |
| Swimming sites       | 1077           | 86.23 | 172        | 13.77 | 1249  | <0.001          |
| Non swimming sites   | 1521           | 90.81 | 154        | 9.19  | 1675  |                 |

\*Pearson Chi-square test

**Table S3.** Frequency of enterococci concentration exceeding alert-level thresholds (N, Enterococci CFU per 100 mL > 200) and percentage of samples across seven recreational sites over three time periods.

| Site name         | 2001-2005  |       | 2009-2015  |       | 2015-2021  |       |
|-------------------|------------|-------|------------|-------|------------|-------|
|                   | Exceedance |       | Exceedance |       | Exceedance |       |
|                   | N          | %     | N          | %     | N          | %     |
| Lotus Bay         | 7          | 7.14  | 25         | 15.92 | 20         | 12.2  |
| Ferry Terminal    | 5          | 5.1   | 13         | 8.39  | 4          | 2.42  |
| East Basin        | 14         | 14.29 | 25         | 15.82 | 15         | 9.15  |
| Yarralumla Beach* | 6          | 6.12  | 24         | 15.48 | 25         | 15.34 |
| Black Mt. Beach*  | 11         | 11.22 | 22         | 14.19 | 7          | 4.27  |
| Weston Park East* | 14         | 14.43 | 36         | 23.23 | 27         | 16.46 |
| Weston Park West  | 2          | 2.04  | 15         | 9.68  | 9          | 5.45  |
| Total             | 59         | 8.61  | 160        | 14.68 | 107        | 9.31  |

\*indicates designated swimming beach.

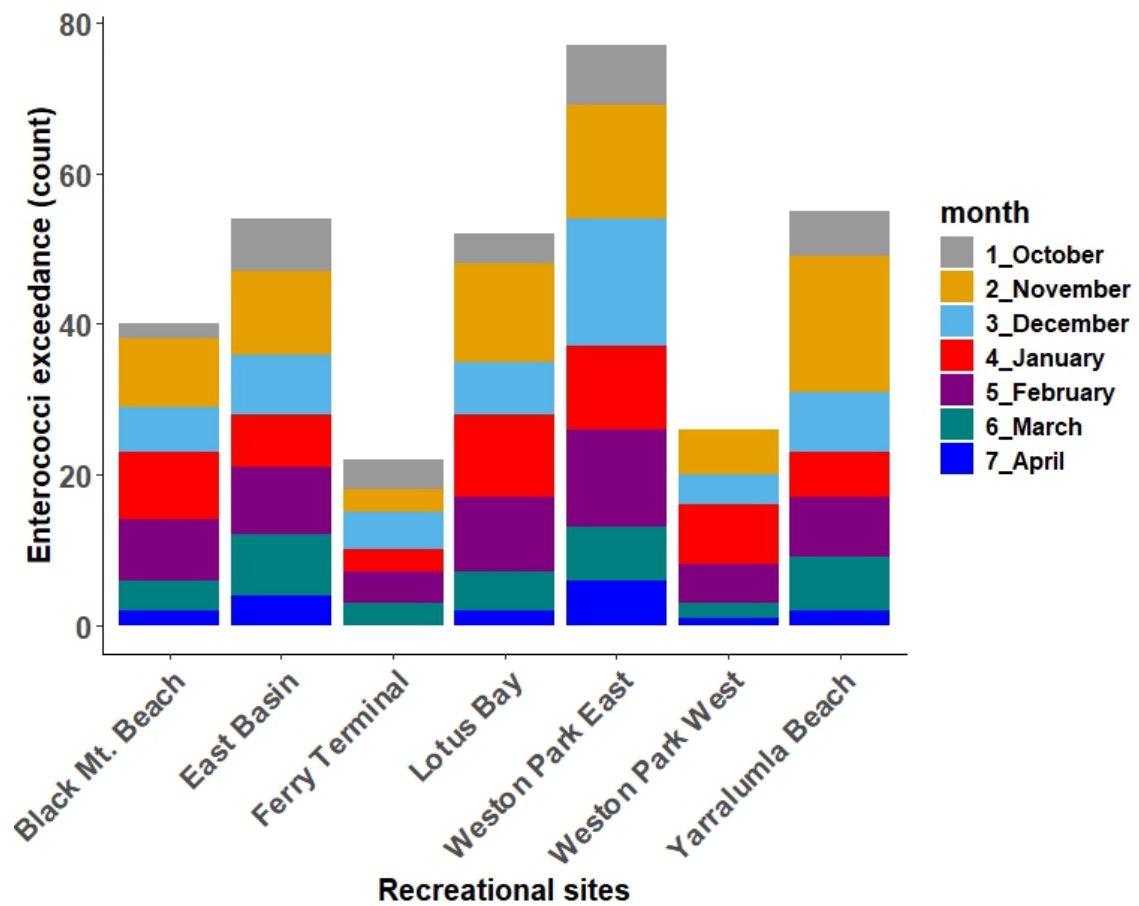

**Figure S2.** Frequency of enterococci concentration exceeding alert-level thresholds (N, Enterococci CFU per 100 mL > 200) across seven sites over seven recreational summer months.
